# Supplementary material for: Inhibition of adenosine deaminase (ADA)-mediated metabolism of cordycepin by natural substances
Source: PubMed Central journal article supplement — Pharmacol Res Perspect. 2015 Feb 10;3(2):e00121. doi: 10.1002/prp2.121 (PMC4448975; doi:10.1002/prp2.121), 2015-02-10
Supplement: prp20003-e00121-sd1.pdf [file prp20003-e00121-sd1.pdf]

# Inhibition of adenosine deaminase (ADA)-mediated metabolism of cordycepin by natural substances

Gen Li, Izumi Nakagome, Shuichi Hirono, Tomoo Itoh, and Ryoichi Fujiwara

Supplementary Figure 1

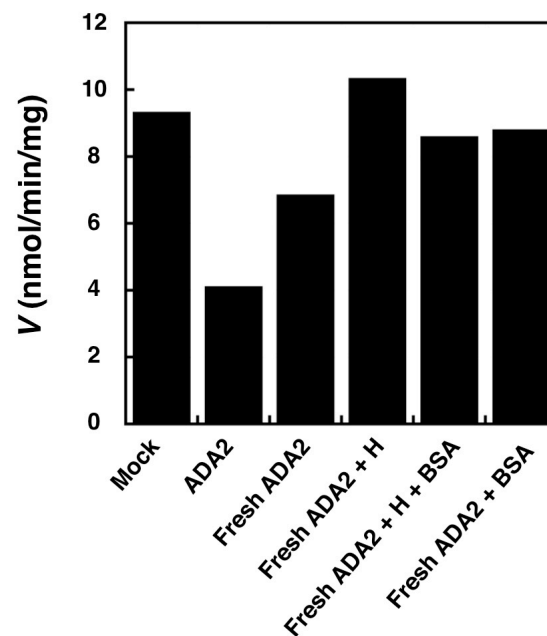

## Supplemental Figure 1. Adenosine deamination activities in Mock cells and

**ADA2-expressing cells.** Adenosine deamination activities were determined using the cells that

were frozen or non-frozen in the presence or absence of heparin (H) or BSA.
